# Supplementary material for: Slow waves form expanding, memory-rich mesostates steered by local excitability in fading anesthesia
Source: PubMed Central journal article supplement — iScience. 2022 Feb 12;25(3):103918. doi: 10.1016/j.isci.2022.103918 (PMC8899414; doi:10.1016/j.isci.2022.103918), 2022-02-12
Supplement: mmc1.pdf [file mmc1.pdf]

iScience, Volume 25

## **Supplemental information**

**Slow waves form expanding, memory-rich  
mesostates steered by local  
excitability in fading anesthesia**

**Antonio Pazienti, Andrea Galluzzi, Miguel Dasilva, Maria V. Sanchez-Vives, and Maurizio  
Mattia**

## Supplemental Information

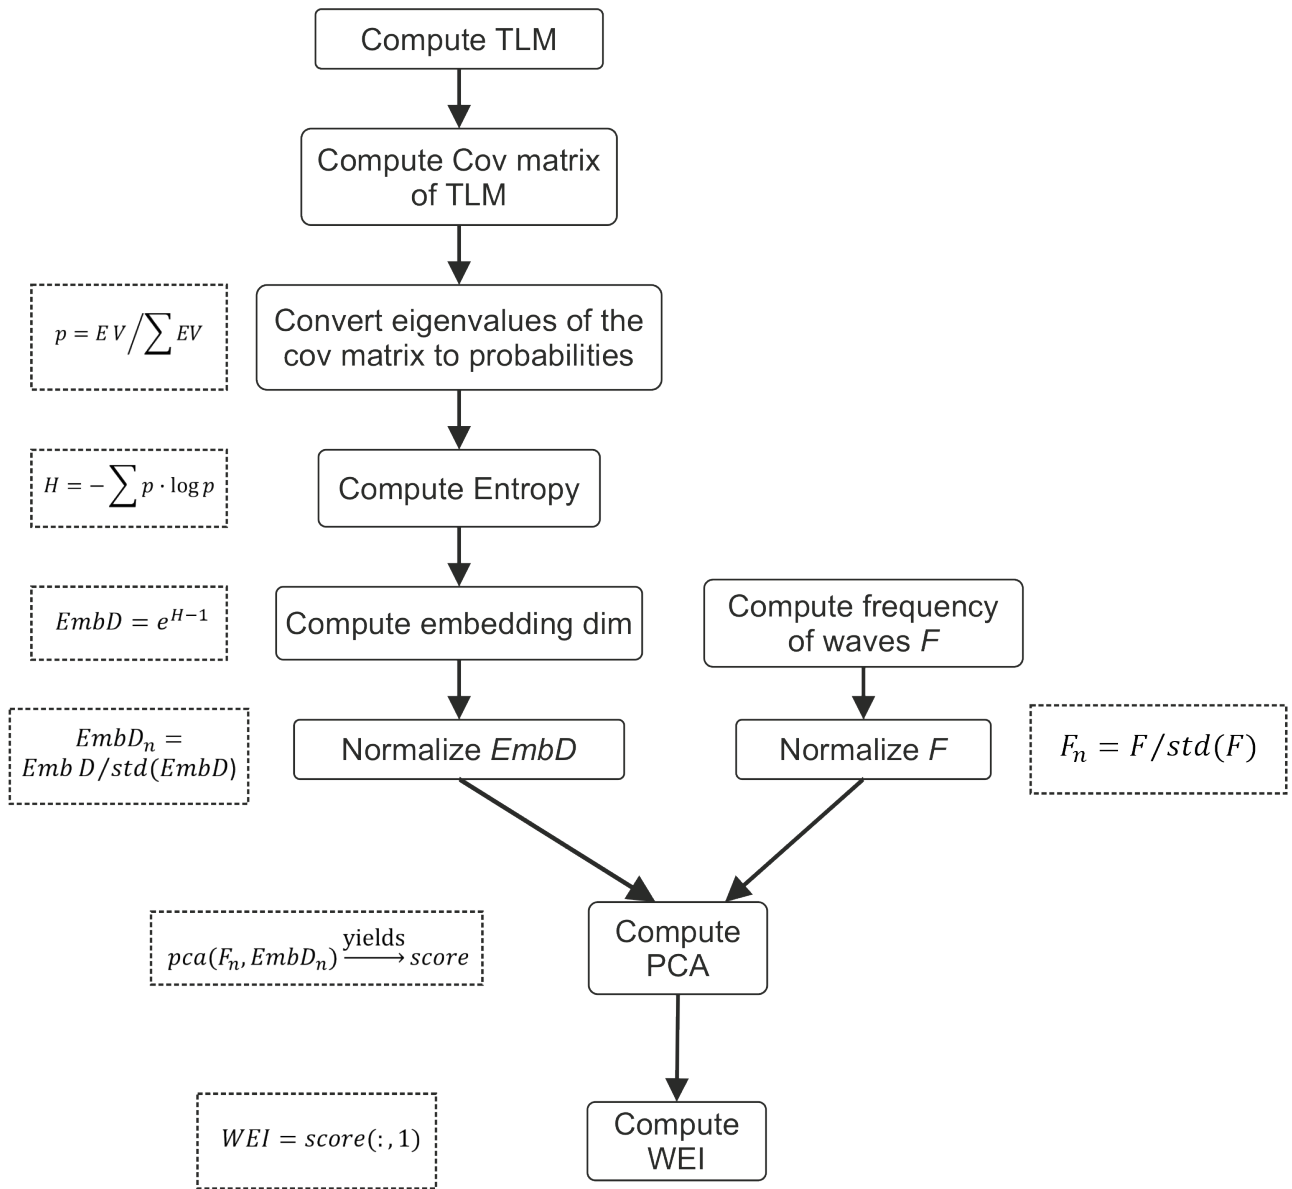

**Figure S1:** Schematic representation of the calculation of the wave entropy index (WEI), Related to Figs. 1-2 and to Section “Extraction of the wave entropy index (WEI)”.
